# Supplementary material for: Perceived Parental Distraction by Technology and Mental Health Among Emerging Adolescents
Source: PubMed Central journal article supplement (PMC11329881; doi:10.1001/jamanetworkopen.2024.28261), 2024-08-16
Supplement: jamanetwopen-e2428261-s001.pdf [file jamanetwopen-e2428261-s001.pdf]

## Supplementary Online Content

Deneault AA, Plamondon A, Neville RD, et al. Perceived parental technofence and mental health among emerging adolescents. *JAMA Netw Open*. 2024;7(8):e2428261.  
doi:10.1001/jamanetworkopen.2024.28261

**eTable 1.** Model Fit and  $\chi^2$  Difference Tests

**eTable 2.** Unstandardized Parameters for the RI-CLPM Anxiety Model With Subgroup Analysis by Gender

**eTable 3.** Unstandardized Parameters for the RI-CLPM Depression Model With Subgroup Analysis by Gender

**eTable 4.** Unstandardized Parameters for the RI-CLPM Attention Difficulties Model With Subgroup Analysis by Gender

**eTable 5.** Unstandardized Parameters for the RI-CLPM Hyperactivity Model With Subgroup Analysis by Gender

This supplementary material has been provided by the authors to give readers additional information about their work.

**eTable 1.** Model Fit and  $\chi^2$  Difference Tests

|                                                                 | RMSEA | SRMR | CFI  | TLI  | $\chi^2$ | df | p      | $\Delta\chi^2$ | df | p      |
|-----------------------------------------------------------------|-------|------|------|------|----------|----|--------|----------------|----|--------|
| Parental technoference $\leftrightarrow$ Anxiety                |       |      |      |      |          |    |        |                |    |        |
| RI-CLPM ( <i>final fitted model</i> )                           | .03   | .01  | .999 | .991 | 2.15     | 1  | .142   | –              | –  | –      |
| RI-CLPM ( <i>constrained</i> )                                  | .02   | .02  | .998 | .995 | 7.84     | 5  | .166   | 5.68           | 4  | .224   |
| CLPM ( <i>traditional</i> )                                     | .09   | .03  | .977 | .913 | 46.35    | 4  | < .001 | 44.20          | 3  | < .001 |
| Parental technoference $\leftrightarrow$ Depression             |       |      |      |      |          |    |        |                |    |        |
| RI-CLPM ( <i>final fitted model</i> ) <sup>a</sup>              | –     | –    | –    | –    | –        | –  | –      | –              | –  | –      |
| RI-CLPM ( <i>constrained</i> )                                  | .07   | .05  | .975 | .947 | 45.89    | 7  | < .001 | –              | –  | –      |
| CLPM ( <i>traditional</i> )                                     | .08   | .04  | .966 | .914 | 60.35    | 6  | < .001 | –              | –  | –      |
| Parental technoference $\leftrightarrow$ Attention difficulties |       |      |      |      |          |    |        |                |    |        |
| RI-CLPM ( <i>final fitted model</i> )                           | .01   | .01  | 1.00 | .998 | 1.19     | 1  | .275   | –              | –  | –      |
| RI-CLPM ( <i>constrained</i> )                                  | .03   | .02  | .997 | .992 | 9.60     | 5  | .088   | 8.41           | 4  | .078   |
| CLPM ( <i>traditional</i> )                                     | .12   | .04  | .958 | .843 | 77.49    | 4  | < .001 | 76.30          | 3  | < .001 |
| Parental technoference $\leftrightarrow$ Hyperactivity          |       |      |      |      |          |    |        |                |    |        |
| RI-CLPM ( <i>final fitted model</i> )                           | .03   | .01  | .999 | .991 | 2.08     | 1  | .149   | –              | –  | –      |
| RI-CLPM ( <i>constrained</i> )                                  | .02   | .02  | .999 | .997 | 6.84     | 5  | .233   | 4.75           | 4  | .314   |
| CLPM ( <i>traditional</i> )                                     | .12   | .04  | .957 | .840 | 78.71    | 4  | < .001 | 76.63          | 3  | < .001 |

Note. <sup>a</sup> This model could not be estimated due to negative variances.

**eTable 2.** Unstandardized Parameters for the RI-CLPM Anxiety Model With Subgroup Analysis by Gender

| Associations                                                  | Girls |                 | Boys  |                |
|---------------------------------------------------------------|-------|-----------------|-------|----------------|
|                                                               | ES    | 95% CI          | ES    | 95% CI         |
| <b>Unstandardized random intercept variance</b>               |       |                 |       |                |
| Tech                                                          | 0.71  | [0.27, 1.15]    | 0.83  | [0.55, 1.22]   |
| MH                                                            | 65.62 | [26.74, 104.51] | 60.93 | [41.99, 79.87] |
| <b>Within-person autoregressive paths<sup>a</sup></b>         |       |                 |       |                |
| Tech <sub>T1</sub> → Tech <sub>T2</sub>                       | 0.24  | [0.01, 0.48]    | 0.22  | [0.03, 0.41]   |
| Tech <sub>T2</sub> → Tech <sub>T3</sub>                       | 0.35  | [0.17, 0.54]    | 0.30  | [0.12, 0.50]   |
| MH <sub>T1</sub> → MH <sub>T2</sub>                           | 0.49  | [0.05, 0.93]    | 0.26  | [0.03, 0.50]   |
| MH <sub>T2</sub> → MH <sub>T3</sub>                           | 0.61  | [0.42, 0.80]    | 0.32  | [0.09, 0.56]   |
| <b>Between-person association<sup>a</sup></b>                 |       |                 |       |                |
| Tech ↔ MH                                                     | 0.25  | [-0.12, 0.63]   | 0.30  | [0.08, 0.52]   |
| <b>Within-person cross-sectional associations<sup>a</sup></b> |       |                 |       |                |
| Tech <sub>T1</sub> ↔ MH <sub>T1</sub>                         | 0.34  | [0.06, 0.62]    | 0.13  | [-0.06, 0.33]  |
| Tech <sub>T2</sub> ↔ MH <sub>T2</sub>                         | 0.26  | [0.11, 0.40]    | 0.29  | [0.13, 0.46]   |
| Tech <sub>T3</sub> ↔ MH <sub>T3</sub>                         | 0.35  | [0.24, 0.46]    | 0.21  | [0.08, 0.34]   |
| <b>Within-person cross-lagged effects<sup>a</sup></b>         |       |                 |       |                |
| <i>Tech driven effects</i>                                    |       |                 |       |                |
| Tech <sub>T1</sub> → MH <sub>T2</sub>                         | -0.03 | [-0.22, 0.16]   | 0.06  | [-0.12, 0.24]  |
| Tech <sub>T2</sub> → MH <sub>T3</sub>                         | -0.01 | [-0.13, 0.12]   | 0.08  | [-0.09, 0.25]  |
| <i>MH driven effects</i>                                      |       |                 |       |                |
| MH <sub>T1</sub> → tech <sub>T2</sub>                         | 0.38  | [-0.00, 0.76]   | 0.27  | [0.04, 0.50]   |
| MH <sub>T2</sub> → tech <sub>T3</sub>                         | 0.50  | [0.32, 0.68]    | 0.31  | [0.08, 0.54]   |

Note. CI = confidence interval; ES = Effect sizes; MH = mental health; Tech = technofence. <sup>a</sup> Standardized values.

**eTable 3.** Unstandardized Parameters for the RI-CLPM Depression Model With Subgroup Analysis by Gender

| Associations                                                  | Girls |                | Boys  |                |
|---------------------------------------------------------------|-------|----------------|-------|----------------|
|                                                               | ES    | 95% CI         | ES    | 95% CI         |
| <b>Unstandardized random intercept variance</b>               |       |                |       |                |
| Tech                                                          | 0.59  | [0.19, 0.99]   | 0.92  | [0.63, 1.21]   |
| MH                                                            | 54.81 | [37.44, 72.17] | 49.28 | [16.65, 81.91] |
| <b>Within-person autoregressive paths<sup>a</sup></b>         |       |                |       |                |
| Tech <sub>T1</sub> → Tech <sub>T2</sub>                       | 0.33  | [0.10, 0.57]   | 0.20  | [0.03, 0.37]   |
| Tech <sub>T2</sub> → Tech <sub>T3</sub>                       | 0.41  | [0.25, 0.56]   | 0.25  | [0.07, 0.42]   |
| MH <sub>T1</sub> → MH <sub>T2</sub>                           | -0.22 | [-0.68, 0.23]  | 0.24  | [-0.16, 0.64]  |
| MH <sub>T2</sub> → MH <sub>T3</sub>                           | 0.38  | [0.26, 0.51]   | 0.45  | [0.24, 0.67]   |
| <b>Between-person association<sup>b</sup></b>                 |       |                |       |                |
| Tech ↔ MH                                                     | 0.32  | [0.01, 0.62]   | 0.27  | [0.00, 0.53]   |
| <b>Within-person cross-sectional associations<sup>b</sup></b> |       |                |       |                |
| Tech <sub>T1</sub> ↔ MH <sub>T1</sub>                         | 0.53  | [0.30, 0.76]   | 0.28  | [0.07, 0.48]   |
| Tech <sub>T2</sub> ↔ MH <sub>T2</sub>                         | 0.29  | [0.09, 0.50]   | 0.40  | [0.24, 0.56]   |
| Tech <sub>T3</sub> ↔ MH <sub>T3</sub>                         | 0.30  | [0.21, 0.39]   | 0.21  | [0.09, 0.33]   |
| <b>Within-person cross-lagged effects<sup>a</sup></b>         |       |                |       |                |
| <i>Tech driven effects</i>                                    |       |                |       |                |
| Tech <sub>T1</sub> → MH <sub>T2</sub>                         | 0.37  | [-0.01, 0.74]  | 0.10  | [-0.09, 0.30]  |
| Tech <sub>T2</sub> → MH <sub>T3</sub>                         | -0.05 | [-0.18, 0.09]  | -0.05 | [-0.17, 0.08]  |
| <i>MH driven effects</i>                                      |       |                |       |                |
| MH <sub>T1</sub> → tech <sub>T2</sub>                         | 0.02  | [-0.25, 0.29]  | 0.07  | [-0.14, 0.28]  |
| MH <sub>T2</sub> → tech <sub>T3</sub>                         | 0.14  | [0.01, 0.27]   | 0.12  | [-0.08, 0.31]  |

Note. CI = confidence interval; ES = Effect sizes; MH = mental health; Tech = technoference. <sup>a</sup> Standardized values.

**eTable 4.** Unstandardized Parameters for the RI-CLPM Attention Difficulties Model With Subgroup Analysis by Gender

| Associations                                                  | Girls |                | Boys  |                 |
|---------------------------------------------------------------|-------|----------------|-------|-----------------|
|                                                               | ES    | 95% CI         | ES    | 95% CI          |
| <b>Unstandardized random intercept variance</b>               |       |                |       |                 |
| Tech                                                          | 0.67  | [0.26, 1.09]   | 0.92  | [0.58, 1.25]    |
| MH                                                            | 67.59 | [51.71, 83.47] | 84.17 | [68.03, 100.30] |
| <b>Within-person autoregressive paths<sup>a</sup></b>         |       |                |       |                 |
| Tech <sub>T1</sub> → Tech <sub>T2</sub>                       | 0.31  | [0.08, 0.53]   | 0.21  | [0.02, 0.40]    |
| Tech <sub>T2</sub> → Tech <sub>T3</sub>                       | 0.42  | [0.24, 0.60]   | 0.28  | [0.10, 0.47]    |
| MH <sub>T1</sub> → MH <sub>T2</sub>                           | -0.12 | [-0.62, 0.37]  | 0.08  | [-0.22, 0.38]   |
| MH <sub>T2</sub> → MH <sub>T3</sub>                           | 0.24  | [0.06, 0.43]   | 0.06  | [-0.19, 0.32]   |
| <b>Between-person association<sup>b</sup></b>                 |       |                |       |                 |
| Tech ↔ MH                                                     | 0.39  | [0.14, 0.63]   | 0.14  | [-0.05, 0.32]   |
| <b>Within-person cross-sectional associations<sup>b</sup></b> |       |                |       |                 |
| Tech <sub>T1</sub> ↔ MH <sub>T1</sub>                         | 0.10  | [-0.19, 0.39]  | 0.06  | [-0.14, 0.27]   |
| Tech <sub>T2</sub> ↔ MH <sub>T2</sub>                         | 0.09  | [-0.18, 0.35]  | 0.25  | [0.03, 0.48]    |
| Tech <sub>T3</sub> ↔ MH <sub>T3</sub>                         | 0.26  | [0.15, 0.38]   | 0.14  | [-0.01, 0.28]   |
| <b>Within-person cross-lagged effects<sup>a</sup></b>         |       |                |       |                 |
| <i>Tech driven effects</i>                                    |       |                |       |                 |
| Tech <sub>T1</sub> → MH <sub>T2</sub>                         | -0.03 | [-0.32, 0.26]  | 0.09  | [-0.12, 0.30]   |
| Tech <sub>T2</sub> → MH <sub>T3</sub>                         | 0.00  | [-0.16, 0.16]  | 0.25  | [0.04, 0.46]    |
| <i>MH driven effects</i>                                      |       |                |       |                 |
| MH <sub>T1</sub> → tech <sub>T2</sub>                         | -0.06 | [-0.34, 0.21]  | 0.06  | [-0.16, 0.29]   |
| MH <sub>T2</sub> → tech <sub>T3</sub>                         | 0.03  | [-0.11, 0.17]  | 0.06  | [-0.11, 0.24]   |

Note. CI = confidence interval; ES = Effect sizes; MH = mental health; Tech = technoference. <sup>a</sup> Standardized values.

**eTable 5.** Unstandardized Parameters for the RI-CLPM Hyperactivity Model With Subgroup Analysis by Gender

| Associations                                                  | Girls |                | Boys  |                |
|---------------------------------------------------------------|-------|----------------|-------|----------------|
|                                                               | ES    | 95% CI         | ES    | 95% CI         |
| <b>Unstandardized random intercept variance</b>               |       |                |       |                |
| Tech                                                          | 0.67  | [0.26, 1.08]   | 0.88  | [0.54, 1.22]   |
| MH                                                            | 57.96 | [45.94, 69.98] | 58.13 | [43.55, 72.70] |
| <b>Within-person autoregressive paths<sup>a</sup></b>         |       |                |       |                |
| Tech <sub>T1</sub> → Tech <sub>T2</sub>                       | 0.32  | [0.10, 0.54]   | 0.22  | [0.04, 0.41]   |
| Tech <sub>T2</sub> → Tech <sub>T3</sub>                       | 0.42  | [0.23, 0.60]   | 0.25  | [0.05, 0.44]   |
| MH <sub>T1</sub> → MH <sub>T2</sub>                           | 0.03  | [-0.29, 0.36]  | 0.17  | [-0.08, 0.42]  |
| MH <sub>T2</sub> → MH <sub>T3</sub>                           | 0.14  | [-0.09, 0.38]  | 0.13  | [-0.11, 0.38]  |
| <b>Between-person association<sup>b</sup></b>                 |       |                |       |                |
| Tech ↔ MH                                                     | 0.50  | [0.24, 0.75]   | 0.08  | [-0.15, 0.30]  |
| <b>Within-person cross-sectional associations<sup>b</sup></b> |       |                |       |                |
| Tech <sub>T1</sub> ↔ MH <sub>T1</sub>                         | 0.09  | [-0.14, 0.32]  | 0.13  | [-0.07, 0.33]  |
| Tech <sub>T2</sub> ↔ MH <sub>T2</sub>                         | -0.02 | [-0.28, 0.24]  | 0.39  | [0.21, 0.57]   |
| Tech <sub>T3</sub> ↔ MH <sub>T3</sub>                         | 0.25  | [0.12, 0.37]   | 0.24  | [0.10, 0.39]   |
| <b>Within-person cross-lagged effects<sup>a</sup></b>         |       |                |       |                |
| <i>Tech driven effects</i>                                    |       |                |       |                |
| Tech <sub>T1</sub> → MH <sub>T2</sub>                         | -0.11 | [-0.35, 0.13]  | 0.16  | [-0.03, 0.34]  |
| Tech <sub>T2</sub> → MH <sub>T3</sub>                         | -0.07 | [-0.27, 0.13]  | 0.20  | [-0.01, 0.40]  |
| <i>MH driven effects</i>                                      |       |                |       |                |
| MH <sub>T1</sub> → tech <sub>T2</sub>                         | -0.17 | [-0.40, 0.06]  | 0.10  | [-0.10, 0.30]  |
| MH <sub>T2</sub> → tech <sub>T3</sub>                         | -0.03 | [-0.19, 0.12]  | 0.17  | [-0.02, 0.36]  |

Note. CI = confidence interval; ES = Effect sizes; MH = mental health; Tech = technoference. <sup>a</sup> Standardized values.
