# Supplementary material for: Perceived Parental Distraction by Technology and Mental Health Among Emerging Adolescents
Source: PubMed Central journal article supplement (PMC11329881; doi:10.1001/jamanetworkopen.2024.28261), 2024-08-16
Supplement: jamanetwopen-e2428261-s002.pdf [file jamanetwopen-e2428261-s002.pdf]

## Data Sharing Statement

Deneault. Perceived Parental Technoference and Mental Health Among Emerging Adolescents. *JAMA Netw Open*. Published August 16, 2024.

doi:10.1001/jamanetworkopen.2024.28261

### Data

**Data available:** Yes

**Data types:** Data dictionary

**How to access data:** Request to corresponding author.

**When available:** With publication

### Supporting Documents

**Document types:** Statistical/analytic code

**How to access documents:** Request to corresponding author.

**When available:** With publication

### Additional Information

**Who can access the data:** Researchers whose proposed use of the data has been approved.

**Types of analyses:** For approved purposes.

**Mechanisms of data availability:** After approval from the AOF process.

**Any additional restrictions:** The All Our Families Cohort data are available through requests to the study (<https://ucalgary.ca/allourfamilies>), and metadata of variables can be found at <https://www.maelstrom-research.org/study/aof>. Restrictions apply to the availability of these deidentified data, which were used according to data sharing agreements.
